# Supplementary material for: Data-driven haemodynamic response function extraction using Fourier-wavelet regularised deconvolution
Source: Springer Nature journal article supplement (doi:10.1186/1471-2342-8-7), 2008-04-10
Supplement: 12880_2007_47_MOESM4_ESM.pdf [file 12880_2007_47_MOESM4_ESM.pdf]

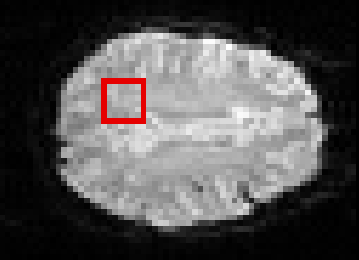

(a)

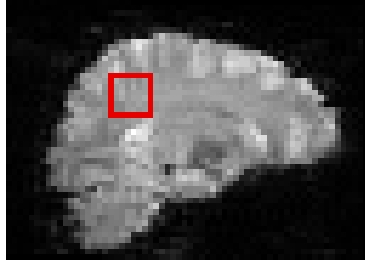

(b)

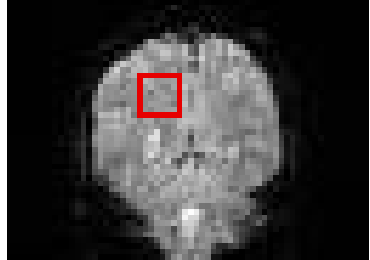

(c)
