# Supplementary material for: Data-driven haemodynamic response function extraction using Fourier-wavelet regularised deconvolution
Source: Springer Nature journal article supplement (doi:10.1186/1471-2342-8-7), 2008-04-10
Supplement: 12880_2007_47_MOESM16_ESM.pdf [file 12880_2007_47_MOESM16_ESM.pdf]

|                                  |                     |                |        |        |                    |        |
|----------------------------------|---------------------|----------------|--------|--------|--------------------|--------|
| experiment                       | random ISI data set |                |        |        | fixed ISI data set |        |
| extraction method                | selective averaging | <i>ForWaRD</i> |        |        | <i>ForWaRD</i>     |        |
| included voxels                  | volume              | region         | volume | region | volume             | region |
| model: $\text{HRF}_{\text{gam}}$ | 98.21               | 120.99         | 97.55  | 106.87 | 106.05             | 155.60 |
| model: $\text{HRF}_{\text{spm}}$ |                     |                | 65     |        |                    | 112    |
